# Supplementary material for: Association of Weight Loss from Early to Middle Adulthood and Incident Hypertension Risk Later in Life
Source: PubMed Central journal article supplement (PMC7551896; doi:10.3390/nu12092622), 2020-08-28
Supplement: nutrients-12-02622-s001.pdf [file nutrients-12-02622-s001.pdf]

1 Supplemental Figure

2

3 Figure S1. Survival analysis study design: weight change and onset hypertension.

4

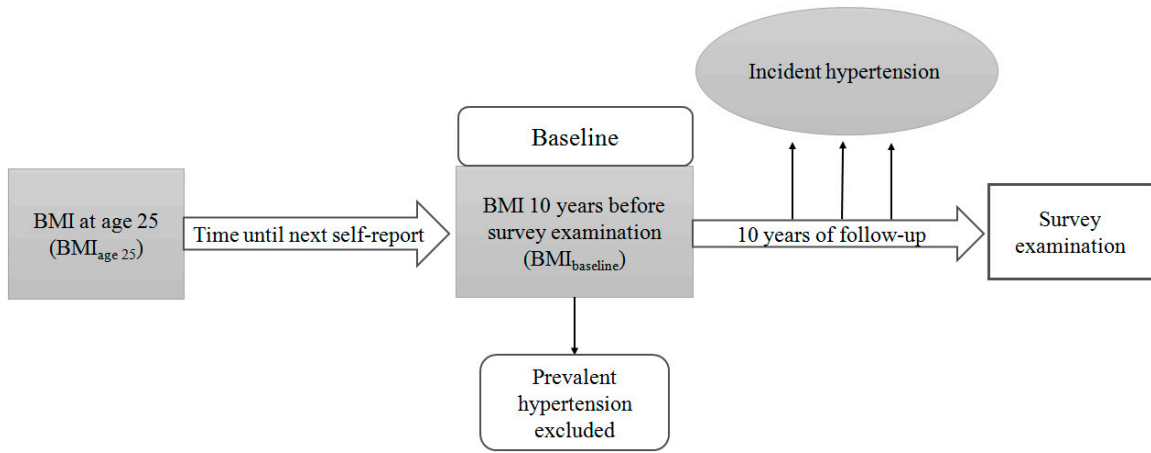

5

6

7

8  
9  
10

Figure S2. A flow chart of inclusion and exclusion of study participants.

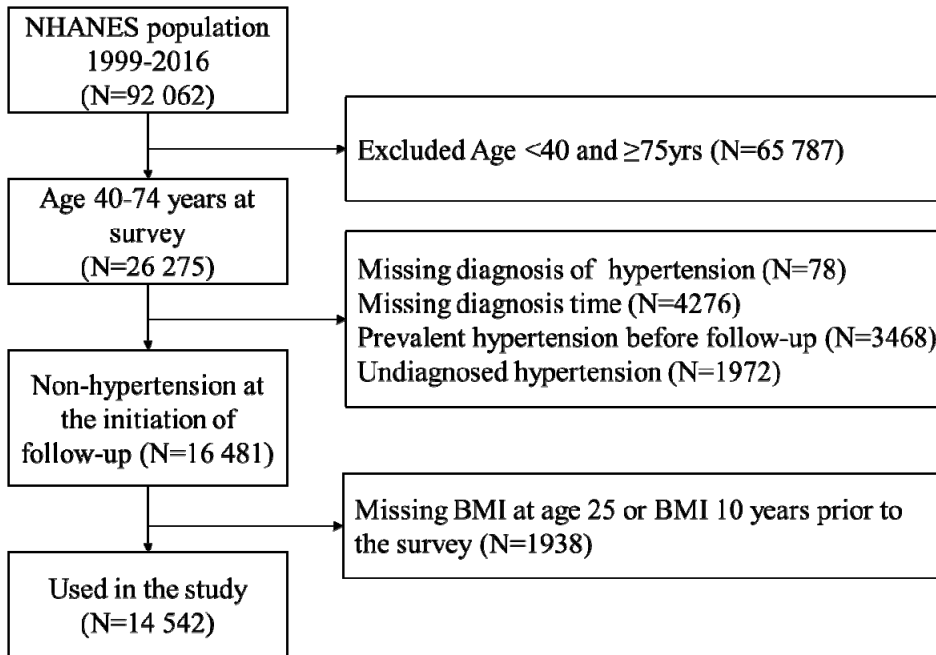

11  
12

13

14 **Table S1. Hazard ratios (95% confidence intervals) of incident hypertension with BMI status at baseline in the NHANES**  
 15 **1999-2016 <sup>a</sup>**

| Weight Patterns <sup>b</sup>    | Model 1 <sup>c</sup> |          | Model 2 <sup>d</sup> |          |
|---------------------------------|----------------------|----------|----------------------|----------|
|                                 | HR (95% CI)          | <i>P</i> | HR (95% CI)          | <i>P</i> |
| Underweight                     | 0.95 (0.68, 1.33)    | 0.752    | 0.92 (0.61, 1.37)    | 0.673    |
| <b>Normal (ref)</b>             | 1.00                 |          | 1.00                 |          |
| Overweight                      | 1.76 (1.54, 2.02)    | <0.001   | 1.80 (1.58, 2.05)    | <0.001   |
| Class 1 obesity                 | 2.70 (2.39, 3.04)    | <0.001   | 2.77 (2.42, 3.16)    | <0.001   |
| Class 2 obesity                 | 3.59 (2.97, 4.35)    | <0.001   | 3.31 (2.70, 4.07)    | <0.001   |
| Class 3 obesity                 | 3.90 (3.26, 4.66)    | <0.001   | 3.72 (3.05, 4.54)    | <0.001   |
| <i>P</i> for Trend <sup>e</sup> | 1.46 (1.41, 1.51)    | <0.001   | 1.44 (1.39, 1.50)    | <0.001   |

16

<sup>a</sup> All estimates accounted for complex survey designs.

17

<sup>b</sup> We categorized BMI variables into six groups: underweight (<18.0) and normal weight (18.0-24.9), overweight (25.0-29.9), Class 1 obesity (30.0-34.9), Class 2 obesity (35.0-39.9), and Class 3 obesity (≥40).

18

<sup>c</sup> Model 1 : adjusted for baseline age, sex, race/ethnicity.

19

<sup>d</sup> Model 2 : additionally adjusted for education level, family income-poverty ratio level, smoking status.

20

<sup>e</sup> For test of trend, we calculated the association with incident hypertension by treating the categories of weight patterns as ordinal variables.

21

22

23

24 **Table S2. Hazard ratios (95% CIs) of incident hypertension with weight change patterns stratified by BMI at 25 years <sup>a</sup>**

| Weight Change Patterns                        | Model 1 <sup>b</sup> |          | Model 2 <sup>c</sup> |          |
|-----------------------------------------------|----------------------|----------|----------------------|----------|
|                                               | HR (95% CI)          | <i>P</i> | HR (95% CI)          | <i>P</i> |
| <b>Underweight/Normal weight (BMI &lt;25)</b> |                      |          |                      |          |
| Weight loss ≥2.5 kg (ref)                     | 1.00                 |          | 1.00                 |          |
| Weight change within 2.5 kg                   | 0.83 (0.60, 1.15)    | 0.260    | 0.91 (0.66, 1.25)    | 0.558    |
| Weight gain ≥2.5 kg and <10 kg                | 1.21 (0.87, 1.69)    | 0.253    | 1.36 (0.98, 1.89)    | 0.067    |
| Weight gain ≥10 kg and <20 kg                 | 1.79 (1.30, 2.45)    | <0.001   | 2.00 (1.47, 2.73)    | <0.001   |
| Weight gain ≥20 kg                            | 2.50 (1.81, 3.44)    | <0.001   | 2.73 (1.98, 3.74)    | <0.001   |
| <i>P</i> for Trend <sup>d</sup>               | 1.41 (1.34, 1.49)    | <0.001   | 1.41 (1.34, 1.49)    | <0.001   |
| <b>Overweight/Obese (BMI ≥25)</b>             |                      |          |                      |          |
| Weight loss ≥2.5 kg (ref)                     | 1.00                 |          | 1.00                 |          |
| Weight change within 2.5 kg                   | 0.94 (0.70, 1.28)    | 0.714    | 1.05 (0.78, 1.42)    | 0.751    |
| Weight gain ≥2.5 kg and <10 kg                | 1.31 (0.92, 1.85)    | 0.130    | 1.51 (1.07, 2.14)    | 0.019    |
| Weight gain ≥10 kg and <20 kg                 | 1.75 (1.28, 2.39)    | 0.001    | 2.00 (1.48, 2.71)    | <0.001   |
| Weight gain ≥20 kg                            | 2.05 (1.47, 2.86)    | <0.001   | 2.24 (1.61, 3.10)    | <0.001   |
| <i>P</i> for Trend <sup>d</sup>               | 1.25 (1.17, 1.33)    | <0.001   | 1.27 (1.19, 1.35)    | <0.001   |

25 <sup>a</sup> All estimates accounted for complex survey designs.

26 <sup>b</sup> Model 1 : adjusted for baseline age, sex, race/ethnicity.

27 <sup>c</sup> Model 2 : additionally adjusted for education level, family income-poverty ratio level, smoking status.

28 <sup>d</sup> For test of trend, we calculated the association with incident hypertension by treating the categories of weight change  
 29 patterns as ordinal variables.

30

31 **Table S3. Hazard ratios (95% CIs) of incident hypertension with weight change patterns across adulthood in NHANES 1999-2016 <sup>a</sup>**

| Category                | Weight Change Patterns                           | Incident Hypertension n/(person-years) | Model 1 <sup>b</sup> |        | Model 2 <sup>c</sup> |        |
|-------------------------|--------------------------------------------------|----------------------------------------|----------------------|--------|----------------------|--------|
|                         |                                                  |                                        | HR (95% CI)          | P      | HR (95% CI)          | P      |
| Category 1 <sup>d</sup> |                                                  |                                        |                      |        |                      |        |
|                         | <b>Stable Normal (ref)</b>                       | 1560/64422                             | 1.00                 |        | 1.00                 |        |
|                         | Maximum Overweight                               | 1888/54554                             | 1.43 (1.31, 1.57)    | <0.001 | 1.43 (1.41, 1.57)    | <0.001 |
|                         | Non-obese to Obese                               | 1123/22676                             | 2.15 (1.95, 2.36)    | <0.001 | 2.12 (1.93, 2.34)    | <0.001 |
|                         | Obese to Non-obese                               | 48/1588                                | 1.45 (0.94, 2.24)    | 0.091  | 1.38 (1.17, 3.31)    | 0.147  |
|                         | Stable Obese                                     | 337/7190                               | 2.42 (2.06, 2.83)    | <0.001 | 2.37 (2.02, 2.77)    | <0.001 |
|                         | <b>Stable Obese (ref)</b>                        | 337/7190                               | 1.00                 |        | 1.00                 |        |
|                         | Stable Normal                                    | 1560/64422                             | 0.41 (0.35, 0.48)    | <0.001 | 0.42 (0.36, 0.49)    | <0.001 |
|                         | Maximum Overweight                               | 1888/54554                             | 0.59 (0.50, 0.70)    | <0.001 | 0.61 (0.52, 0.71)    | <0.001 |
|                         | Non-obese to Obese                               | 1123/22676                             | 0.89 (0.75, 1.05)    | 0.175  | 0.90 (0.76, 1.06)    | 0.205  |
|                         | Obese to Non-obese                               | 48/1588                                | 0.60 (0.39, 0.93)    | 0.024  | 0.59 (0.37, 0.92)    | 0.019  |
| Category 2 <sup>e</sup> |                                                  |                                        |                      |        |                      |        |
|                         | <b>Weight loss <math>\geq</math>2.5 kg (ref)</b> | 261/8994                               | 1.00                 |        | 1.00                 |        |
|                         | Weight change within 2.5 kg                      | 1011/41036                             | 0.83 (0.68, 1.01)    | 0.068  | 1.04 (0.84, 1.28)    | 0.717  |
|                         | Weight gain $\geq$ 2.5 kg and <10 kg             | 1532/51338                             | 1.04 (0.86, 1.26)    | 0.676  | 1.36 (1.10, 1.68)    | 0.005  |
|                         | Weight gain $\geq$ 10 kg and <20 kg              | 1247/31113                             | 1.35 (1.13, 1.60)    | 0.001  | 1.77 (1.47, 2.15)    | <0.001 |
|                         | Weight gain $\geq$ 20 kg                         | 905/17949                              | 1.71 (1.41, 2.08)    | <0.001 | 2.08 (1.68, 2.56)    | <0.001 |

32 <sup>a</sup> All estimates accounted for complex survey designs. Hypertension cases including those who had elevated blood pressure at survey examination.

33 <sup>b</sup> Model 1 :adjusted for baseline age, sex, race/ethnicity.

34 <sup>c</sup> Model 2 : additionally adjusted for education level, family income-poverty ratio level, smoking status. In the Category 2 analyses, we also included BMI at the age  
35 25 years as potential confounders in model 2.

36 <sup>d</sup> Stable Normal pattern (BMI <25.0 at both timepoints), Maximum Overweight pattern (BMI 25.0-29.9 at either timepoint but not  $\geq$ 30.0 at the other timepoint),  
37 Non-obese to Obese pattern (BMI <30.0 at younger age and  $\geq$ 30.0 later), Obese to Non-obese pattern (BMI  $\geq$ 30.0 at younger age and <30.0 later), and Stable Obese  
38 (BMI  $\geq$ 30.0 at both timepoints).

39 <sup>e</sup> Absolute weight change: weight loss of at least 2.5 kg, weight change within 2.5 kg, weight gain of at least 2.5 kg but less than 10.0 kg, weight gain of at least 10 kg  
40 but less than 20.0 kg, and weight gain of at least 20.0 kg.
